# Supplementary material for: PRTN3 variant correlates with increased autoantigen levels and relapse risk in PR3-ANCA versus MPO-ANCA disease
Source: PubMed Central journal article supplement (PMC9977496; doi:10.1172/jci.insight.166107), 2023-02-22
Supplement: jciinsight-8-166107-s189.pdf [file jciinsight-8-166107-s189.pdf]

**List of Supplementary Figures and Tables:**

Supplemental Figure 1. Example of agarose gel visualization of genotyping of samples

Supplemental Figure 2. Mean *PRTN3* expression by variant.

Supplemental Figure 3: Autoantigen gene expression in leukocytes based on variant carrier status and activity status.

Supplemental Figure 4. Relapse or remission status by MPO and PR3 after achieving remission within each genotype group.

Supplemental Figure 5. Map of *PRTN3* associated variants in linkage disequilibrium with rs62132293.

Supplemental Table 1. List of primers and probes for TaqMan qPCR.

Supplemental Table 2. Baseline Characteristics of cohort based on variant status, PR3/c-ANCA patients.

Supplemental Table 3. Baseline Characteristics of cohort based on variant status, MPO/p-ANCA patients.

**Supplementary Figure 1.** Example of agarose gel visualization for genotyping samples. For PCR, genomic DNA was isolated from whole blood patient samples and the region upstream of *PRTN3* containing the SNP was amplified using: forward primer 5'-GAGCTGACTCATGGCTGAAACCAAC-3', reverse primer 5'-TGATGTGTATTAAAGAACTAGAGCT-3'. PCR products were separated by agarose gel electrophoresis and imaged using iBrightFL1000(Invitrogen). Genotype determination was by visualization as the G allele is associated with a deletion within this region resulting in a smaller band compared to C allele.

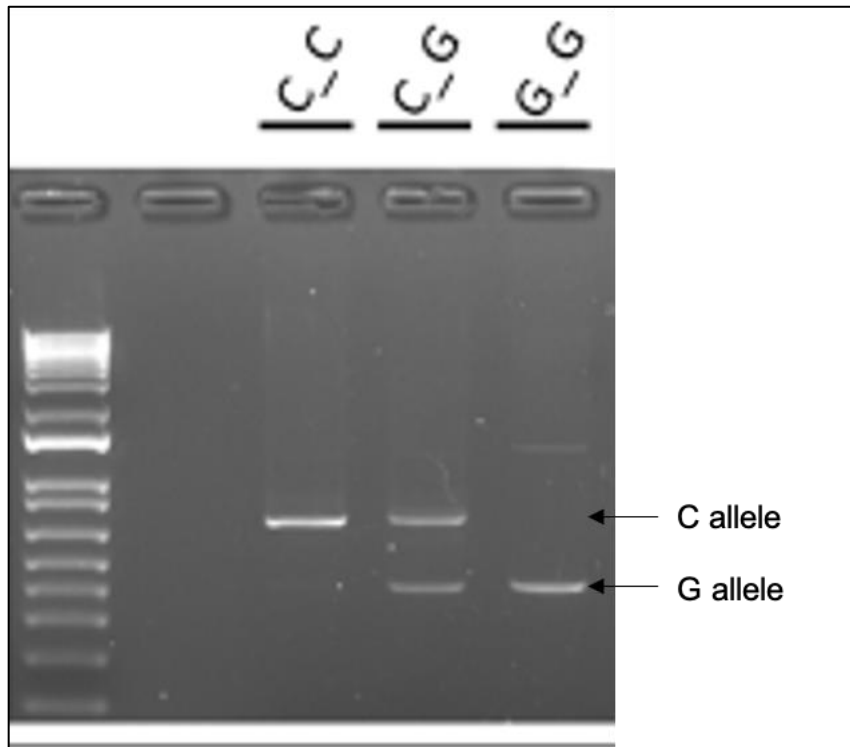

Supplementary Figure 2. Mean PRTN3 expression by variant.

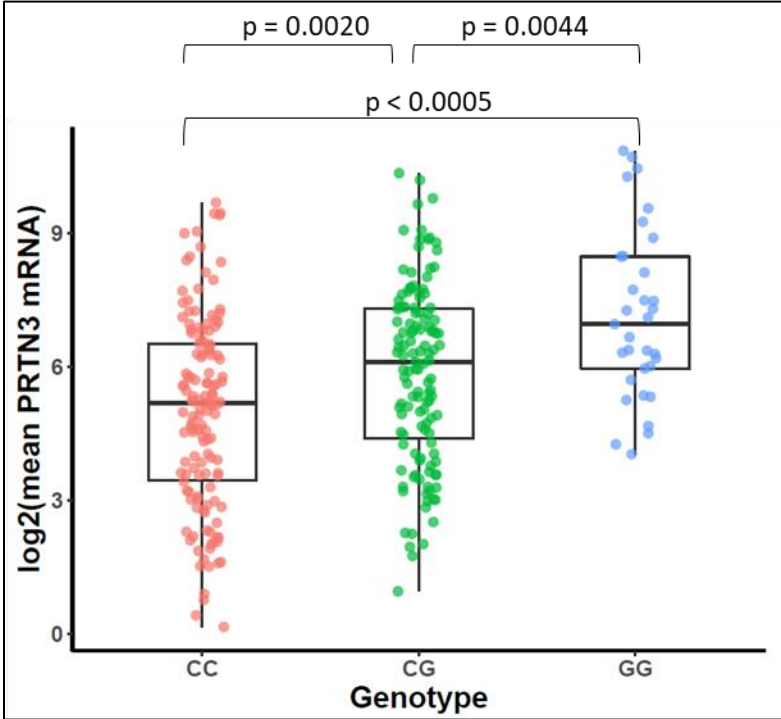

**Supplementary Figure 3: Autoantigen gene expression in leukocytes based on variant carrier status and activity status.** A. Autoantigen gene expression of *PRTN3* in leukocytes remains elevated in homozygous groups regardless of activity status. B. Autoantigen gene expression of MPO does not change based on activity status. If multiple samples were available from individual patient, sample with maximum expression (peak) was used. Patient disease status was classified as active or remission according to criteria described in Methods. ANCA serotypes were determined by indirect immunofluorescence and antigen-specific PR3 and MPO ELISA. Mean and standard deviation are shown, ANOVA P values adjusted by Tukey's multiple comparison test.

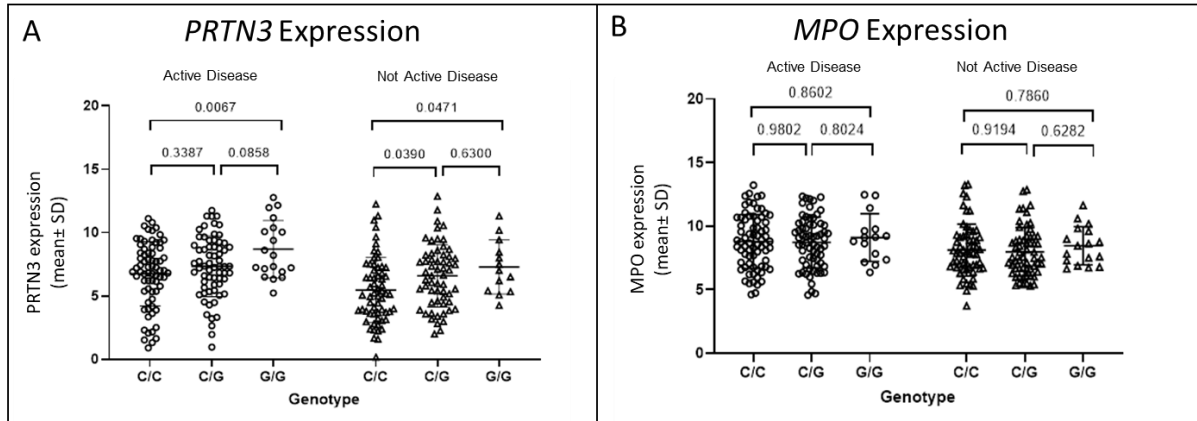

**Supplementary Figure 4.** Relapse or remission status by MPO and PR3 after achieving remission within each genotype group.

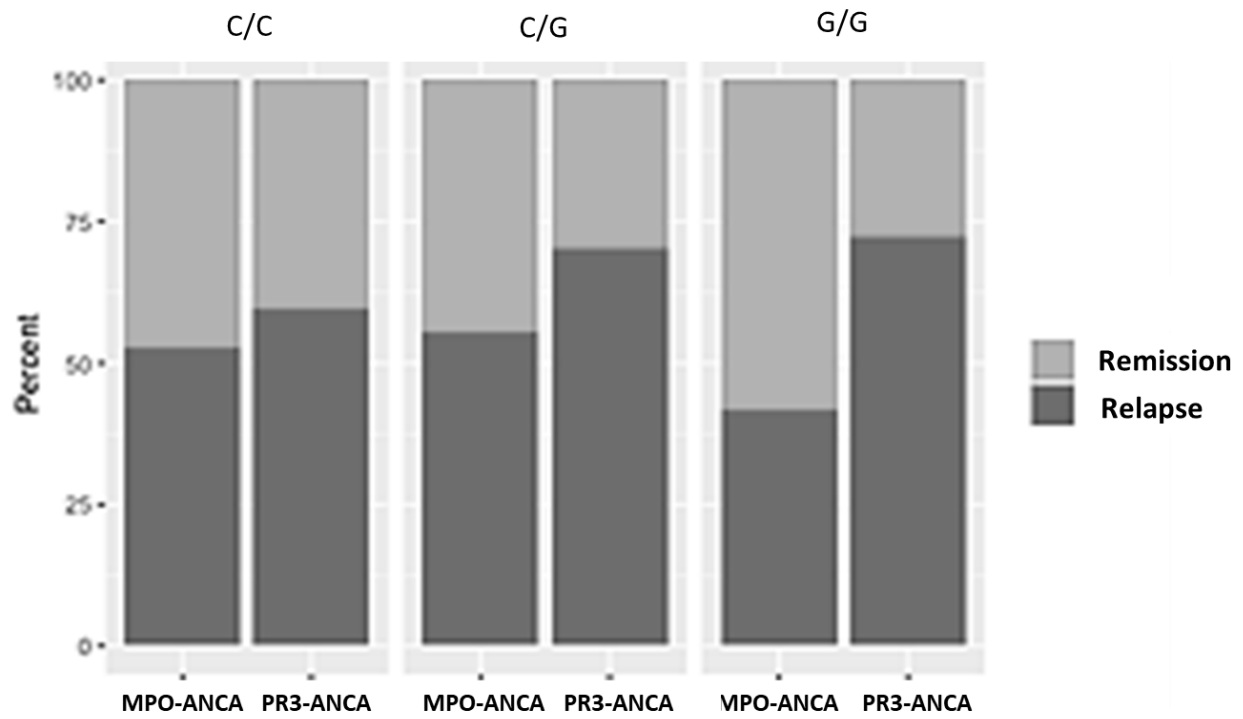

|                            | MPO, C/C  | PR3, C/C  | MPO, C/G  | PR3, C/G  | MPO, G/G | PR3, G/G  |
|----------------------------|-----------|-----------|-----------|-----------|----------|-----------|
| <b>Remission<br/>(n,%)</b> | 43(47.2%) | 23(40.3%) | 32(44.4%) | 21(29.6%) | 7(58.3%) | 5(27.8%)  |
| <b>Relapse<br/>(n, %)</b>  | 48(52.8%) | 34(59.7%) | 40(55.6%) | 50(70.2%) | 5(41.7%) | 13(72.2%) |

**Supplementary Figure 5.** The rs62132293 variant is in strong linkage disequilibrium with other variants associated with PRTN3 gene expression in whole blood, including the ANCA GWAS variant from a study of European individuals (rs62132295,  $r^2=0.94$ ) and the variant most strongly associated with PRTN3 (rs138303849,  $r^2=0.75$ ) as reported by the Genotype-Tissue Expression (GTEx) project. The GWAS variant is also in linkage disequilibrium with a variant associated with serum PR3 (PRTN3) protein levels (rs7251804,  $r^2=0.77$ ).

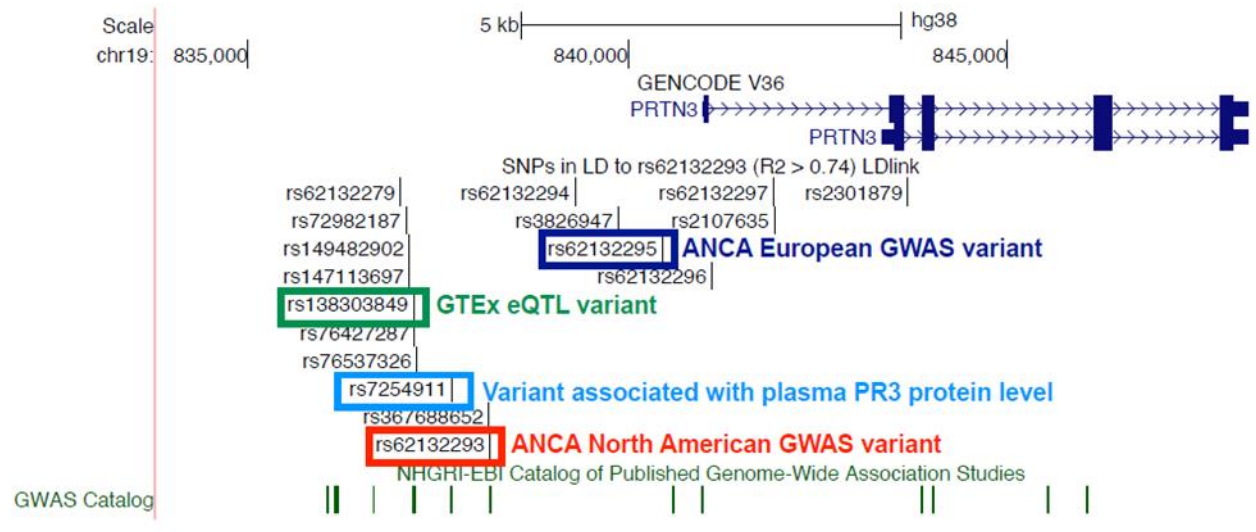

## Supplemental Table 1

| Primers and Probe for TaqMan quantitative real-time PCR |                              |                                                 |                                                    |
|---------------------------------------------------------|------------------------------|-------------------------------------------------|----------------------------------------------------|
| Gene                                                    | Primer                       | Sequence                                        | Company                                            |
| MPO                                                     | Forward                      | 5'-CCA GGA AGC CCG GAA GAT-3'                   | Integrated DNA Technologies, INC<br>Coralville, IA |
|                                                         | Reverse                      | 5'-CGG AAG GCA TTG GTG AAG A-3'                 |                                                    |
|                                                         | Probe                        | FAM-TGC CCA CGT ACC GTT CCT ACA ATG ACT C-TAMRA |                                                    |
| PRTN3                                                   | Forward                      | 5'-TGT CAC CGT GGT CAC CTT CTT-3'               |                                                    |
|                                                         | Reverse                      | 5'-CCC CAG ATC ACG AAG GAG TCT AT-3'            |                                                    |
|                                                         | Probe                        | FAM-TTG CAC TTT CGT CCC TCG CCG-TAMRA           |                                                    |
| COX5B                                                   | Forward                      | 5'-TGG CAT CTG GAG GTG TT-3'                    |                                                    |
|                                                         | Reverse                      | 5'-GTC CAG TCC CTT CTT TGC AGC-3'               |                                                    |
|                                                         | Probe                        | FAM-TGA TGA AGA GCA GGC GAC TGG GTT G-MGB       |                                                    |
|                                                         |                              |                                                 |                                                    |
| Gene                                                    | TaqMan Gene Expression Assay |                                                 | Company                                            |
| MPO                                                     | Hs00924296_m1                |                                                 | ThermoFisher, Waltham, MA                          |
| PRTN3                                                   | Hs01597752_m1                |                                                 |                                                    |
| COX5B                                                   | HS00426948_m1                |                                                 |                                                    |

**Supplemental Table 2: Baseline Characteristics of cohort according to SNP status, PR3/C patients**

| Variables                                                         | CC (n=65)           | CG(n=85)            | GG(n=20)            | p-value |
|-------------------------------------------------------------------|---------------------|---------------------|---------------------|---------|
| Age, median(IQR) Years                                            | 52.97(39.12, 61.67) | 52.77(41.23, 65.00) | 32.67(24.07, 45.26) | 0.0037  |
| Age<18yo                                                          | 5(7.69%)            | 5(5.88%)            | 2(10.00%)           | 0.6948  |
| Male                                                              | 36(55.38%)          | 52(61.18%)          | 15(75%)             | 0.2818  |
| Race (non-white)                                                  | 5(7.69%)            | 4(4.71%)            | 0(0.00%)            | 0.4976  |
| Follow-up time median (IQR) Years                                 | 5.42(2.16, 10.61)   | 5.21(1.64, 9.24)    | 7.31(3.18, 11.74)   | 0.3414  |
| Diagnosis                                                         |                     |                     |                     | 0.5181  |
| Missing                                                           | 1                   | 2                   | 1                   |         |
| EGPA                                                              | 1(1.56%)            | 0(0.00%)            | 1(5.26%)            |         |
| GPA                                                               | 35(54.69%)          | 43(51.81%)          | 12(63.16%)          |         |
| Lim                                                               | 3(4.69%)            | 5(6.02%)            | 0(0.00%)            |         |
| MPA                                                               | 25(39.06%)          | 35(42.17%)          | 6(31.58%)           |         |
| Estimated GFR at enrollment, median(IQR) (based on peak entry Cr) | 33.50(20.00, 84.82) | 26.15(13.65, 62.42) | 56.93(23.36, 85.45) | 0.0499  |
| Highest BVAS, median(IQR)                                         | 6.00(0,13.00)       | 8.50(0,16.00)       | 11.00(6.00, 13.00)  | 0.4258  |
| BVAS (Max PR3) median(IQR)                                        | 1.00(0.00, 7.00)    | 0.00(0.00, 6.00)    | 1.50(0.00, 10.00)   | 0.9563  |
| Organ Involvement, n (%)                                          |                     |                     |                     |         |
| Lung                                                              | 43(66.15%)          | 57(67.06%)          | 12(60%)             | 0.827   |
| Upper Resp                                                        | 40(61.54%)          | 48(56.47%)          | 14(70%)             | 0.5258  |
| Joints                                                            | 33(50.77%)          | 44(51.76%)          | 13(65%)             | 0.5396  |
| Neurological                                                      | 12(18.46%)          | 11(12.94%)          | 6(30%)              | 0.1629  |
| Skin                                                              | 18(27.69%)          | 22(25.88%)          | 7(35%)              | 0.6937  |
| Kidney                                                            | 49(75.38%)          | 74(87.06%)          | 14(70%)             | 0.0808  |



**Supplemental Table 3: Baseline Characteristics of cohort according to SNP status, MPO/P patients**

| Variables                                                         | CC (n=100)          | CG(n=82)            | GG(n=15)            | p-value |
|-------------------------------------------------------------------|---------------------|---------------------|---------------------|---------|
| Age, median(IQR) Years                                            | 58.57(42.85, 70.00) | 54.01(45.30, 68.71) | 48.53(23.87, 69.87) | 0.4688  |
| Age<18yo                                                          | 7(7.00%)            | 5(6.10%)            | 1(6.67%)            | 1.0000  |
| Male                                                              | 46(46%)             | 36(43.9%)           | 9(60%)              | 0.5345  |
| Race (non-white)                                                  | 12(12%)             | 7(8.54%)            | 1(6.67%)            | 0.7636  |
| Follow-up time median (IQR) Years                                 | 4.60(2.68, 9.26)    | 4.84(2.19, 9.87)    | 4.26(2.08, 7.41)    | 0.8618  |
| Diagnosis                                                         |                     |                     |                     | 0.8224  |
| Missing                                                           | 0                   | 3                   | 0                   |         |
| EGPA                                                              | 2(2%)               | 3(3.80%)            | 1(6.67%)            |         |
| GPA                                                               | 24(24%)             | 16(20.25%)          | 2(13.33%)           |         |
| Lim                                                               | 20(20%)             | 17(21.52%)          | 4(26.67%)           |         |
| MPA                                                               | 54(54%)             | 43(54.43%)          | 8(53.33%)           |         |
| Estimated GFR at enrollment, median(IQR) (based on peak entry Cr) | 25.07(14.82, 45.20) | 27.67(16.40, 63.58) | 24.39(11.57, 56.01) | 0.7613  |
| Highest BVAS, median(IQR)                                         | 7.00(2.00,12.00)    | 7.00(3.00, 14.00)   | 5.00(3.00, 17.00)   | 0.9837  |
| BVAS Max PR, Median(IQR)                                          | 0.00(0.00, 6.00)    | 2.00(0.00, 6.00)    | 4.00(0.00, 6.00)    | 0.4703  |
| Organ Involvement , n (%)                                         |                     |                     |                     |         |
| Lung                                                              | 44(44%)             | 27(32.93%)          | 5(33.33%)           | 0.3022  |
| Upper Resp                                                        | 33(33%)             | 27(32.93%)          | 5(33.33%)           | 1.0000  |
| Joints                                                            | 32(32%)             | 33(40.24%)          | 6(40%)              | 0.4785  |
| Neurological                                                      | 15(15%)             | 7(8.54%)            | 1(6.67%)            | 0.3810  |
| Skin                                                              | 14(14%)             | 15(18.29%)          | 2(13.33%)           | 0.7917  |
| Kidney                                                            | 81(81%)             | 67(81.71%)          | 13(86.67%)          | 0.9608  |
